# Supplementary material
Source: PubMed Central journal article supplement (PMC3223307)
Supplement: ismej201167x2.pdf [file ismej201167x2.pdf]

**A novel fungal family of oligopeptide transporters identified by functional metatranscriptomics of soil eukaryotes.**

Coralie Damon, Laurent Vallon, Sabine Zimmermann, Muhammad Z. Haider, Virginie Galeote, Sylvie Dequin, Patricia Luis, Laurence Fraissinet-Tachet, and Roland Marmeisse

**Figure S2.** Amino acid sequence alignment of the Ptr2-p proteins encoded by the functional *PTR2* gene of *S. cerevisiae* strain S288c and by the two non-functional *PTR2* alleles identified in the EC1118 wine strain.

```

PTR2-S288c      1-MLNHPSQGSDDAQDEKQGDFPVIEEEKTQAVTLKDSYVSDDVANSTERYNLSPSPEDEDFEGPTEEMQTLRHVGGKIPMRCWLIATIVE
PTR2 Hap.1 EC11181-MLNHPSQGSDDAQDEKQGDFPVIEEEKTQAVTLKDSYVSDDVANSTERYNLSPSPEDEDFEAPTEEMQTLRHVGGKIPMRCWLIATIVE
PTR2 Hap.2 EC11181-MLNHPSQGSDDAQDEKQGDFPVIEEEKTQAVTLKDSYVSDDVANSTERYNLSPSPEDEDFEAPLKKKRL*-70

PTR2-S288c      LSERFSYYGLSAPFQNYMEYGPNDSPKGVLSLNSQGATGLSYFFQFWCYVTPVFGGYVADTFWGKYNTICCGTAIYIAGIFILFITSIP
PTR2 Hap.1 EC1118 LSERFSYYGLSAPFQNYMEYGPNDSPKGVLSLNSQGATGLSYFFQFWCYVTPVFGGYVADTFWGKYNTICCGTAIYIAGIFILFITSIP

PTR2-S288c      SVGNRDSAIGGFIAAIIILIGIATGMIKANLSVLIADQLPKRKPSIKVLKSGERVIVDSNITLQNVFMFFYFMINVGSLSLMMATTELEYH
PTR2 Hap.1 EC1118 SVGNRDSAIGGFIAAIIILIGIATGMIKANLSVLIADQLPKRKPSIKVLKSGERVIVDSNITLQNVFMFFYFMINVGSLSLMMATTELEYH

PTR2-S288c      KGFWAAYLLPFCFFWIAVVTLIFGKKQYIQRPIGDKVIAKSFKVCWILTKNKFDFNAAKPSVHPEKNYPWNDKFDVEIKRALAACKVFI
PTR2 Hap.1 EC1118 KGFWAAYLLPFCFFWIAVVTLIFGKKQ*-294

PTR2-S288c      FYPIYWTQYGTMISSFITQASMMELHGIPNDFLQAFDSIALIIFIPIFEKVVYPIRRYTPLPKIPITKIFFGFMFSGSFAMTWAAVLQSFV
PTR2-S288c      YKAGPWYNEPLGHNTPNHVHVCWQIPAYVLISFSEIFASITGLEIYAYSKAPASMKSFIMSIIFLLTNAFGSAIGCALSPVTVDPKFTWLF
PTR2-S288c      TGLAVACFISGCLFWLCFRKYNDTEEMNAMDYEEDEFDLNPI SAPKANDIEILEPMESLRSTTKY*-601

```
